# Supplementary material for: Accumulation Mechanism and Risk Assessment of Artemisia selengensis Seedling In Vitro with the Hydroponic Culture under Cadmium Pressure
Source: MDPI journal article supplement (doi:10.3390/ijerph19031183), 2022-01-21
Supplement: s1 [file s1]

# Accumulation mechanism and risk assessment of *Artemisia selengensis* seedling in vitro with the hydroponic culture under cadmium pressure

Tao Tang <sup>1,2</sup>, Wei Kang <sup>2,3,\*</sup>, Mi Shen <sup>2</sup>, Lin Chen <sup>1,2</sup>, Xude Zhao <sup>2</sup>, Yongkui Wang <sup>2</sup>, Shunwen Xu <sup>4</sup>, Anhuai Ming <sup>4</sup>, Tao Feng <sup>1</sup>, Haiyan Deng <sup>2</sup>, Shuqi Zheng <sup>2</sup>

<sup>1</sup> School of Resources and Environmental Engineering, Wuhan University of Science and Technology, Wuhan, 430080, China; tangtaowkd@163.com (T.T.); Chenlin1735@163.com (L.C.); fengtaowhu@163.com (T.F.)

<sup>2</sup> Hubei Provincial Key Laboratory of Mining Area Environmental Pollution Control and Remediation, Hubei Polytechnic University, Huangshi 435003, China; 223004@hbpu.edu.cn (M.S.); zhaoxude@hbpu.edu.cn (X.Z.); 204055@hbpu.edu.cn (Y.W.); bx\_ollie08051005@163.com (H.D.); Zhengshuqi2021@163.com (S.Z.)

<sup>3</sup> College of Environmental Engineering, Wuhan Textile University, Wuhan, 430200, China; kangwei@hbpu.edu.cn (W.K.)

<sup>4</sup> Huangshi Vegetable Industry Development Center, Huangshi 435003, China; xunshunwen2021@163.com (S.X.); minganhuai@163.com (A.M.)

\* Correspondence: kangwei@hbpu.edu.cn; Tel.: +86-15072077233

## Supplementary Material

### List

1. Figure S1: The growth of *A. selengensis* tissue culture seedlings after 40 days of cultivation.
2. Table S1: Translocation factor (TF) of *A. selengensis* shoots and leaves.
3. Figure S2: Cd content (Dry weight) of *A. selengensis*, (a): root, (b): stem, (c): leaf.

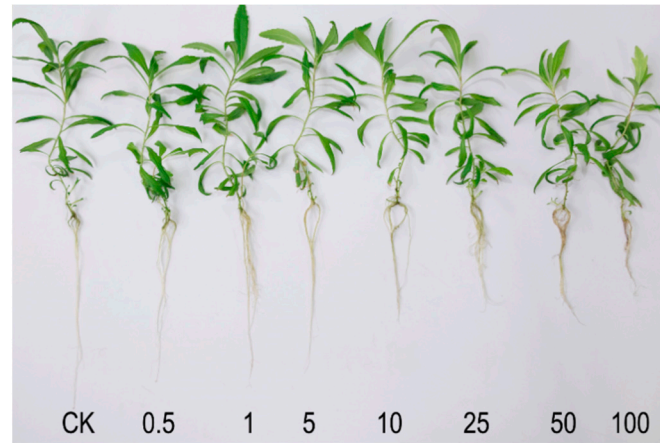

**Figure S1.** The growth of *Artemisia selengensis* tissue culture seedlings after 40 days of cultivation. From left to right, the concentration of Cd treatments are 0  $\mu\text{M}$ , 0.5  $\mu\text{M}$ , 1  $\mu\text{M}$ , 5  $\mu\text{M}$ , 10  $\mu\text{M}$ , 25  $\mu\text{M}$ , 50  $\mu\text{M}$  and 100  $\mu\text{M}$ .

**Table S1.** Translocation factor (TF) of *A. selengensis* shoots and leaves.

| Cd<br>Concentration( $\mu$ M) | Day 10          |                 | Day 20          |                 | Day 30          |                 | Day 40          |                 |
|-------------------------------|-----------------|-----------------|-----------------|-----------------|-----------------|-----------------|-----------------|-----------------|
|                               | stem            | leaf            | stem            | leaf            | stem            | leaf            | stem            | leaf            |
| 0.5                           | 0.77 $\pm$ 0.10 | 0.18 $\pm$ 0.02 | 0.47 $\pm$ 0.03 | 0.21 $\pm$ 0.01 | 0.34 $\pm$ 0.01 | 0.17 $\pm$ 0.01 | 0.25 $\pm$ 0.02 | 0.15 $\pm$ 0.02 |
| 1                             | 0.72 $\pm$ 0.06 | 0.25 $\pm$ 0.09 | 0.50 $\pm$ 0.04 | 0.23 $\pm$ 0.01 | 0.32 $\pm$ 0.03 | 0.22 $\pm$ 0.02 | 0.27 $\pm$ 0.01 | 0.20 $\pm$ 0.01 |
| 5                             | 1.06 $\pm$ 0.04 | 0.32 $\pm$ 0.01 | 0.57 $\pm$ 0.04 | 0.20 $\pm$ 0.01 | 0.42 $\pm$ 0.04 | 0.23 $\pm$ 0.04 | 0.30 $\pm$ 0.02 | 0.23 $\pm$ 0.01 |
| 10                            | 0.99 $\pm$ 0.03 | 0.39 $\pm$ 0.01 | 0.60 $\pm$ 0.02 | 0.24 $\pm$ 0.01 | 0.40 $\pm$ 0.09 | 0.28 $\pm$ 0.06 | 0.40 $\pm$ 0.03 | 0.23 $\pm$ 0.02 |
| 25                            | 1.01 $\pm$ 0.04 | 0.37 $\pm$ 0.01 | 0.51 $\pm$ 0.01 | 0.20 $\pm$ 0.04 | 0.41 $\pm$ 0.02 | 0.18 $\pm$ 0.01 | 0.36 $\pm$ 0.01 | 0.19 $\pm$ 0.02 |
| 50                            | 0.55 $\pm$ 0.02 | 0.09 $\pm$ 0.01 | 0.36 $\pm$ 0.03 | 0.18 $\pm$ 0.02 | 0.32 $\pm$ 0.06 | 0.12 $\pm$ 0.02 | 0.29 $\pm$ 0.01 | 0.12 $\pm$ 0.01 |
| 100                           | 0.34 $\pm$ 0.02 | 0.08 $\pm$ 0.01 | 0.26 $\pm$ 0.03 | 0.14 $\pm$ 0.02 | 0.24 $\pm$ 0.02 | 0.16 $\pm$ 0.02 | 0.26 $\pm$ 0.01 | 0.15 $\pm$ 0.01 |

The value shown is mean  $\pm$  S.D.

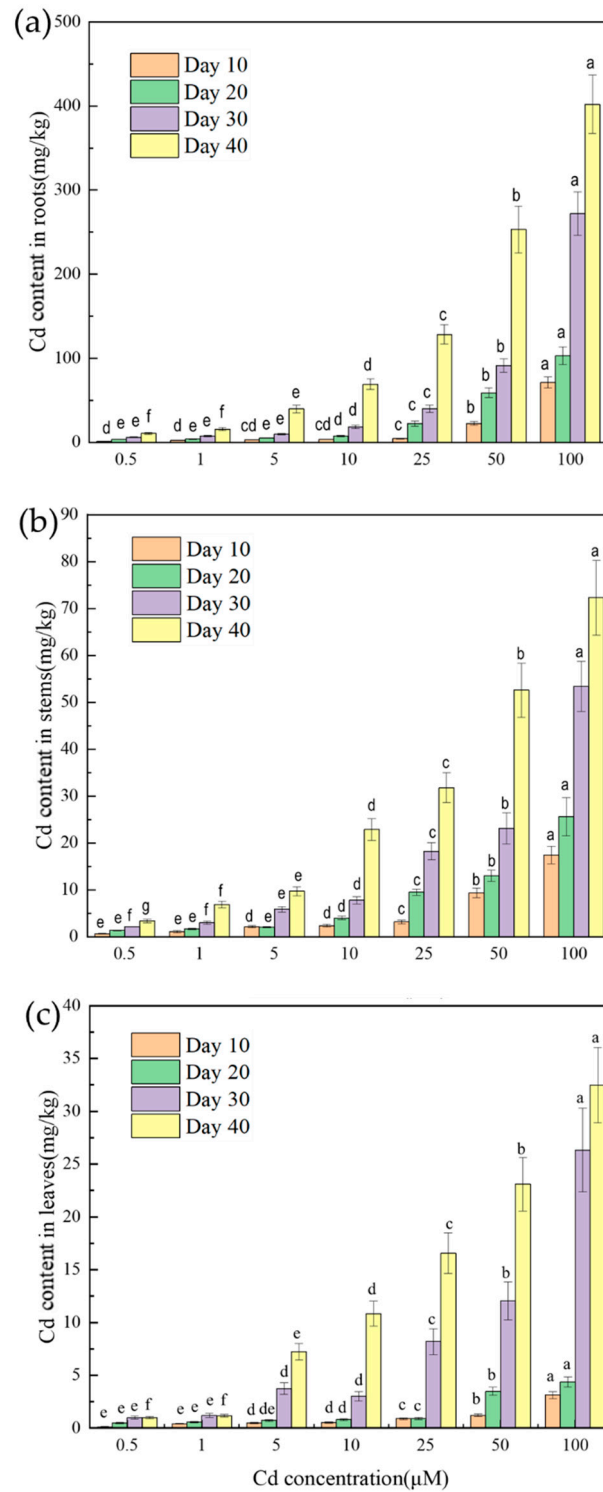

**Figure S2.** Cd content (Dry weight) of *A. selengensis*, (a): root, (b): stem, (c): leaf. The results are means  $\pm$  SD ( $n = 3$ ), Lower letters mean significant differences ( $p < 0.05$ ) between different Cd concentrations at the same treatment time.
